# Supplementary material
Source: MDPI journal article supplement (https://www.mdpi.com/2071-1050/14/2/686)
Supplement: s1 [file s1]

## Supplementary material

# Biochar phosphate fertilizer loaded with urea preserves available nitrogen longer than conventional urea

Cristiane Francisca Barbosa, Dehon Aparecido Correa, Jefferson Santana da Silva Carneiro and Leônidas Carrijo Azevedo Melo \*

**Table S1.** Analysis of variance (ANOVA) with the Mean Square (Mean Sq) values and the significance level of the parameters analyzed in the soil after the cultivation of beans and maize under PLB-N and urea fertilization.

| Bean       |    |                  |           | Mean Sq. |          |           |        |                 |          |                              |                              |                                                            |
|------------|----|------------------|-----------|----------|----------|-----------|--------|-----------------|----------|------------------------------|------------------------------|------------------------------------------------------------|
| Factor     | Df | SDM <sup>1</sup> | Total SDM | N uptake | P uptake | Mg uptake | pH     | EC <sup>2</sup> | Resin P  | NH <sub>4</sub> <sup>+</sup> | NO <sub>3</sub> <sup>-</sup> | NH <sub>4</sub> <sup>+</sup> /NO <sub>3</sub> <sup>-</sup> |
| Treatments | 5  | 206.59**         | 284.74**  | 25.01**  | 0.73**   | 2.55**    | 0.83** | 43.41**         | 228.77** | 8.58**                       | 19.71**                      | 0.96**                                                     |
| Error      | 18 | 5.51             | 4.99      | 1.49     | 0.03     | 0.22      | 0.01   | 0.05            | 0.87     | 0.11                         | 0.13                         | 0.02                                                       |
| Maize      |    |                  |           |          |          |           |        |                 |          |                              |                              |                                                            |
| Treatments | 5  | 470.94**         | ---       | 35.33**  | 1.62**   | 2.87**    | 0.02   | 0.65**          | 38.02**  | 17.38**                      | 38.06**                      | 0.51**                                                     |
| Error      | 18 | 3.74             | ---       | 0.14     | 0.02     | 0.02      | 0.01   | 0.004           | 2.68     | 0.75                         | 0.20                         | 0.04                                                       |

Asterisks indicate the level of significance. \*\*  $p < 0.01$ ; \*  $p < 0.05$ ; A lack of \* symbols indicates significance at  $p < 0.1$ . <sup>1</sup>SDM= Shoot dry matter; <sup>2</sup>EC= Electrical conductivity
